1 **Enhancing resolution of natural methylome reprogramming behavior in plants**

2

3 Robersy Sanchez<sup>†</sup>, Xiaodong Yang<sup>†</sup>, Jose R Barreras, Hardik Kundariya and Sally A. Mackenzie\*

4

5 Departments of Biology and Plant Science, The Pennsylvania State University, University Park, PA

6 16802

7

8

9

10

11

12

13

14

15 <sup>†</sup>Equal contributors

16

17 \*Correspondence to: [sam795@psu.edu](mailto:sam795@psu.edu)

18

19 Sally Mackenzie

20 362 Frear North Bldg

21 Pennsylvania State University

22 University Park, PA 16802

23 Ph 814-863-8324, email [sam795@psu.edu](mailto:sam795@psu.edu)

24

25

26

27 Robersy Sanchez: [rus547@psu.edu](mailto:rus547@psu.edu)

28 Xiaodong Yang: [xiaodongy86@gmail.com](mailto:xiaodongy86@gmail.com)

29 Jose R Barreras: [barreras@gmail.com](mailto:barreras@gmail.com)

30 Hardik Kundariya: [kundariyahardik@gmail.com](mailto:kundariyahardik@gmail.com)

31 Sally Mackenzie: [sam795@psu.edu](mailto:sam795@psu.edu)

32

33 **Abstract**

34 **Background**

35 Natural methylome reprogramming within chromatin involves changes in local energy landscapes that are  
36 subject to thermodynamic principles. Signal detection permits the discrimination of methylation signal  
37 from dynamic background noise that is induced by thermal fluctuation. Current genome-wide methylation  
38 analysis methods do not incorporate biophysical properties of DNA, and focus largely on DNA  
39 methylation density changes, which limits resolution of natural, more subtle methylome behavior in  
40 relation to gene activity.

41  
42 **Results**

43 We present here a novel methylome analysis procedure, Methyl-IT, based on information  
44 thermodynamics and signal detection. Methylation analysis involves a signal detection step, and the  
45 method was designed to discriminate methylation regulatory signal from background variation.  
46 Comparisons with commonly used programs and two publicly available methylome datasets, involving  
47 stages of seed development and drought stress effects, were implemented. Information divergence  
48 between methylation levels from different groups, measured in terms of Hellinger divergence, provides  
49 discrimination power between control and treatment samples. Differentially informative methylation  
50 positions (DIMPs) achieved higher sensitivity and accuracy than standard differentially methylated  
51 positions (DMPs) identified by other methods. Differentially methylated genes (DMG) that are based on  
52 DIMPs were significantly enriched in biologically meaningful networks.

53  
54 **Conclusions**

55 Methyl-IT analysis enhanced resolution of natural methylome reprogramming behavior to reveal  
56 network-associated responses, offering resolution of gene pathway influences not attainable with previous  
57 methods.

58

59 **Keywords**

60 Epigenomics, DNA methylation, gene expression, information theory, Arabidopsis

61

## 62 **Background**

63 Most chromatin changes that are associated with epigenetic behavior are reprogrammed each generation,  
64 with the apparent exception of cytosine methylation, where parental patterns can be inherited through  
65 meiosis [1]. Genome-wide methylome analysis, therefore, provides one avenue for investigation of  
66 transgenerational and developmental epigenetic behavior. Complicating such investigations in plants is  
67 the dynamic nature of DNA methylation [2, 3] and a presently incomplete understanding of its association  
68 with gene expression. In plants, cytosine methylation is generally found in three contexts, CG, CHG and  
69 CHH (H=C, A or T), with CG most prominent within gene body regions [4]. Association of CG gene  
70 body methylation with changes in gene expression remains in question. There exist ample data  
71 associating chromatin behavior with plant response to environmental changes [5], yet, affiliation of  
72 genome-wide DNA methylation with these effects, or their inheritance, remains inconclusive [6, 7].

73

74 The epigenetic landscape is modulated by thermodynamic fluctuations that influence DNA stability [8, 9]  
75 [10]. Most genome-wide methylome studies have relied predominantly on statistical approaches that  
76 ignore fundamental biophysical properties of cytosine DNA methylation, offering limited resolution of  
77 those genomic regions with highest probability of having undergone epigenetic change. Jenkinson and  
78 colleagues [11] have implemented statistical physics and information theory to the analysis of whole  
79 genome methylome data to define sample-specific energy landscapes. Our group [12, 13] proposed an  
80 information thermodynamics approach to investigate genome-wide methylation patterning based on the  
81 statistical mechanical effect of methylation on DNA molecules. The information thermodynamics-based  
82 approach is postulated to provide greater sensitivity for resolving true signal from background variation  
83 within the methylome [12]. Because gene-associated biological signal created within the dynamic  
84 methylome environment characteristic of plants may be subtle and is not free from background noise, the  
85 approach, designated Methyl-IT, includes application of signal detection theory [14-18].

86

87 A basic requirement for the application of signal detection is a probability distribution for background  
88 noise. Probability distribution, as a Weibull distribution model, can be deduced on a statistical mechanical  
89 basis for DNA methylation induced by thermal fluctuations [12]. Assuming that this background  
90 methylation variation is consistent with a Poisson process, it can be distinguished from variation  
91 associated with methylation regulatory machinery, which is non-independent for all genomic regions [12].  
92 An information-theoretic divergence to express the background variation will follow a Weibull  
93 distribution model, provided that it is proportional to minimum energy dissipated per bit of information  
94 from methylation change.

95

96 The information thermodynamics model was previously verified with more than 150 Arabidopsis and  
97 more than 90 human methylome datasets [12]. To test application of Methyl-IT to methylome analysis,  
98 and compare resolution to approaches used in programs DSS [19], and methylpy [20], we investigated  
99 two Arabidopsis methylome datasets. For resolution of methylation signal during plant development, we  
100 used previously reported datasets from globular stage (4 days after pollination [DAP]), linear cotyledon  
101 stage (8 DAP), mature green stage (13 DAP), post-mature green stage (18 DAP), dry seed (Ws-0), and  
102 leaf [21, 22]. To assess methylation signal during stress in plants, and association of methylation with  
103 altered gene expression during stress, we investigated data from Ganguly et al. (2017), which involves  
104 mild drought stress by withholding irrigation for 9 days [23, 24]. Direct comparison of outputs by  
105 Methyl-IT with previous analyses by methylpy and DSS are presented.

106

## 107 **Results**

### 108 **The information thermodynamics model and Methyl-IT workflow**

109 Methylation level is generally the ratio of methylated cytosine read counts divided by the sum of  
110 methylated and unmethylated cytosine read counts for a given cytosine site. This is a descriptive variable  
111 that reflects uncertainty of methylation level at a given cytosine site. Most methylation analyses test  
112 whether or not the difference between control (CT) and treatment (TT) methylation levels (the uncertainty  
113 variation) is statistically significant. The approach measures the absolute value of the difference between  
114 methylation levels  $|p_i^{TT} - p_i^{CT}|$  from control ( $p_i^{CT}$ ) and treatment ( $p_i^{TT}$ ) at each cytosine site. The  
115 magnitude of  $|p_i^{TT} - p_i^{CT}|$  is known as total variation distance (TVD).

116

117 To improve resolution of methylation signal, we applied Hellinger divergence (*HD*), ([25], detailed  
118 description included in Methods section). Both TVD and HD are information divergences that follow  
119 asymptotic chi-square distribution [25]. However, HD converges faster and carries more information than  
120 TVD and, consequently, has higher discrimination power [26]. The improvement in discrimination power  
121 is visible in Fig. 1 By way of illustration, we used the drought stress data, where CTR designated  
122 unstressed control group and STR designated stressed group. Fig. 1a shows that treatment methylation  
123 signal on chromosome 1, expressed in terms of methylation level, was indistinguishable from control.  
124 Higher resolutions are reached with TVD and HD, with HD providing highest discrimination power.

125

126 Ganguly et al. reported individual variation and pre-existing methylation differences in the drought stress  
127 materials [24], which is reflected by HD in Fig. 1c. The improvement in resolution attributed to HD  
128 derives from the fact that TVD takes into account only one dimension of the methylation change, while

129 HD is estimated in bi-dimensional space  $(p_i, 1 - p_i)$ , where the goodness-of-fit test to detect differences  
130 is performed.

131  
132 Genome-wide Hellinger divergence for background methylation variation can be modeled by a Weibull  
133 distribution [12]. On the other hand, biologically meaningful methylation changes result in an increment  
134 of Hellinger divergence distinguishable in the signal detection step (Fig. 2). For a given level of  
135 significance  $\alpha$  (Type I error probability, eg.  $\alpha = 0.05$ ), cytosine positions with  $H_{\alpha=0.05}$  can be selected as  
136 sites carrying potential biological signal (shown as the blue shade region under the curve in Fig. 2). True  
137 signal is detected based on optimal cutpoint [27], which can be estimated by area under the curve (AUC)  
138 from a receiver operating characteristic (ROC) built from logistic regression with potential signals from  
139 control and treatment. The AUC is the probability to distinguish biological regulatory signal naturally  
140 generated in the control from that induced by the treatment. Cytosine sites carrying methylation signal are  
141 designated *differentially informative methylation positions* (DIMPs). The probability that a DIMP is not  
142 induced by the treatment is designated probability of false alarm ( $P_{FA}$ , false positive, Fig. 2). As suggested  
143 in Fig. 2, we define DIMPs as cytosine positions with high probability to carry signal created in response  
144 to treatment.

145  
146 Estimation of optimal cutoff from AUC is an additional step to remove any remaining potential  
147 methylation background noise that still remains with probability  $\alpha = 0.05 > 0$ . We define as methylation  
148 signal (DIMP) each cytosine site with Hellinger divergence values above the cutpoint (shown in Fig. 2 as  
149  $H_{33}^{D_T}$ ). Each DIMP-associated signal may or may not be represented within a DMP derived by Fisher's  
150 exact test (or other current tests, Fig. 2). The difference in resolution by current methods versus Methyl-  
151 IT is illustrated by positioning  $H$  value sensitivity for Fisher's exact test (FET) at greater than  $H_{min}$  for  
152 cytosine sites that are DMPs and DIMPs simultaneously (Fig. 2).

153  
154 Table 1 provides a critical but non-unique example; assume there is an experiment that yields read counts  
155 with  $n_i^{mC_c} = 8$ ,  $n_i^{C_c} = 2$ ,  $n_i^{mC_t} = 350$ , and  $n_i^{C_t} = 20$ , where  $n_i^{mC_c}$  and  $n_i^{mC_t}$  refer to methylated cytosine  
156 read counts in control and treatment, respectively, and  $n_i^{C_c}$  and  $n_i^{C_t}$  to non-methylated cytosine counts in  
157 control and treatment, respectively. In the given example, it's clear that control and treatment have  
158 different methylation pattern, but Fisher's exact test (including one tail test or Monte Carlo (MC)  
159 simulations with 3000 resamplings (3k)) failed to detect the difference (for significance level  $\alpha = 0.05$ ).  
160 Root-mean-square test (RMST) used in methylpy [20] and goodness-of-fit test based on Hellinger chi-  
161 square test (HCT, with HD as statistic) [25, 28] proved the sensitivity but still failed to detect the

162 difference (for  $\alpha= 0.05$ ). However, if the hypothetical methylation changes were to occur in the drought  
163 stress experiment, then Weibull distribution modeling in Methyl-IT would yield  $p$ -values of 5.08E-04,  
164 5.08E-04, and 3.20E-04 for each stressed plant (Table 1). Such methylation changes represent potential  
165 DIMPs. The conclusions will remain the same even for a generalized situation with  $n_i^{mCt}$  running between  
166 80 and 350 ( $80 \leq n_i^{mCt} \leq 350$ ). Considering that even a small genome like Arabidopsis contains millions  
167 of cytosine sites, the situation presented in Table 1 is not rare, and the difference caused by statistical tests  
168 listed in Table 1 would be significant. A flow chart integrating the main procedures of Methyl-IT and  
169 optional downstream analysis is shown in Fig. 3.

170

### 171 **Methyl-IT sensitivity and genomic regions targeted by DIMPs**

172 To investigate the sensitivity of Methyl-IT, we applied DIMP detection to the drought stress dataset and  
173 compared with the outputs from other methods. Fig. 4 shows a direct comparison of DIMPs to DMPs  
174 estimated with Fisher's exact test, DMSs (differentially methylated sites) estimated with root mean square  
175 test (RMST, approach implemented in methylpy [20, 21]), and DMCs (differentially methylated cytosines)  
176 estimated with Hellinger chi-square test (HCT).

177

178 In all methylation contexts, 100% of DMPs ( $TVD > 0.25$ ) found by Fisher's exact test, 98.63% of DMSs  
179 ( $TVD > 0.25$ ) found by RMST, and 98.45% of DMCs ( $TVD > 0.25$ ) found by HCT are identified as  
180 DIMPs. On the other hand, DMPs only account for 30.9% of DIMPs, DMSs account for 59.8% of DIMPs,  
181 and DMCs account for 47% of DIMPs. These observations suggest a much higher sensitivity by Methyl-  
182 IT than other methods. DMS and DMC classes were relatively close, which helps validate our use of HD.  
183 Results also suggest that differences in outcome between Methyl-IT and methylpy stem from signal  
184 detection limitations rather than implementation of RMST. Application of signal detection requires  
185 knowledge of the distribution of methylation background noise, which is not a component of the  
186 methylpy procedure.

187

188 To evaluate whether DIMPs target genomic features in agreement with published reports [21-24], we  
189 assessed their distribution across the genome. Fig. 5 shows DIMP distribution pattern within three major  
190 genomic contexts (Gene regions in shades of blue, TE region in shades of red and small RNAs in shades  
191 of green). Because total cytosine number within CHH context is about 5 times higher than CG and CHG  
192 contexts, we have normalized data by presenting DIMP density (ratio of DIMP number at a given region /  
193 total cytosine context number at corresponding region) rather than absolute numbers.

194

195 Results showed general agreement with the Kawakatsu et al. original study [21]. Strong methylation  
196 changes were identified in all three contexts during the seed development process, with DIMP signal  
197 increasing from COT to MG to PMG to dry seed, and reaching its peak in leaf tissue. CHG and CHH  
198 changes were associated predominantly with non-genic and TE regions, and CG DIMPs showed higher  
199 density within gene regions, which agreed with the DMP distribution pattern reported in the original  
200 study[21]. A surprising CHG peak was observed in leaf tissues relative to seed, which we did not pursue  
201 in detail, but may reflect a pronounced tissue-specific transition. Similar DIMP patterns were observed in  
202 the drought stress dataset relative to cytosine context, although with higher signal levels in each context.

203

204 Hierarchical clustering based on AUC criteria and built on the set of 9893 DIMP-associated genes (using  
205 *caTools* R package) permitted classification of seed developmental stages into two main phases:  
206 morphogenesis/maturation versus dormancy (Fig. 6). In this analysis, methylation signal was expressed as  
207 the sum of Hellinger divergence within genes plus 2kb upstream. Within the 9893-dimensional metric  
208 space generated by 9893 AUC-selected genes, the linear cotyledon (*COT*) and mature green (*MG*) stages  
209 (morphogenesis-maturation phase) grouped into a cluster quite distant from post mature green (*PMG*) and  
210 dry seed (*DRY*) stages (dormancy phase). These observations indicate a detectably greater similarity in  
211 methylome patterns between cotyledon and mature green stages, transitioning to a distinguishable state  
212 for post-mature green and dry seed. This transition may relate to the desiccation and dormancy shift that  
213 occurs within this timing [29, 30].

214

### 215 **DIMPs can be predicted using a machine learning approach**

216 An important test of DIMPs detected by the Methyl-IT pipeline is whether or not DIMPs identified within  
217 treatment samples can be discriminated from those in the control. To address this question, machine-  
218 learning approaches were implemented.

219

220 Each DIMP was represented as a four-dimensional vector with variables HD, TV, Weibull probability,  
221 and cytosine relative position. The classification result for simulated data and seed development data are  
222 presented in Table 2. Simulation experiments suggested that classification accuracy mainly depended on  
223 the distance separating Weibull distributions (noise plus signal) for control and treatment. Weibull model  
224 parameter values (alpha.1 and scale.1) from the first simulation for control samples (S11 to S13) were  
225 close to those estimated in the treatment group (S21 to S23), suggesting that corresponding distribution  
226 functions were close as well. Although the classifier performance to predict DIMPs could be considered  
227 acceptable (about 80% accuracy), discriminatory power to predict DIMPs from an external sample (not  
228 included to build the model) was relatively low. If probabilistic models were sufficiently distant, even a



229 classifier trained with samples having an overall mean TVD (absolute values of methylation differences)  
230 equal to 0.13 could achieve good discrimination of DIMPs from an external sample. Importantly, a given  
231 DIMP with the same HD value in control and treatment groups could be discriminated from control group  
232 if the Weibull probability distributions from control and treatment were different.

233

234 Classification of DIMPs was accomplished for the seed development dataset as well. Since each seed  
235 development stage comprised only one sample, groups were formed according to the hierarchical cluster  
236 presented in Fig. 6. The best classification accuracies were obtained for CG and CHH methylation  
237 contexts (Table 2). These were binary classifications, where control samples were the reference class.  
238 Thus, probability  $P(x)$  that a new DIMP  $x$  could be observed in the control class determined its  
239 classification, and the probability that a given DIMP did not classify within the control class was  $1 - P(x)$ .  
240 A classifier model built on the groups CT: COT and MG, and non-CT: PMG and DRY (Table 2) could be  
241 applied to classify a DIMP from the leaf stage sample as non-CT. If a DIMP from the leaf stage classified  
242 as 'CT', this would mean that, with probability  $1 - P(x) > P(x)$ , its current methylation status for the  
243 corresponding cytosine position was not distinguishable from the status observed during early seed stages.  
244 The classifier model does not provide information for whether or not methylation status of a given  
245 cytosine position changed across the developmental stages.

246

#### 247 **Differentially methylated genes identified by DIMPs are biologically meaningful**

248 To investigate DIMP-based resolution of differences between seed development stages or between  
249 stressed vs non-stressed conditions, we defined differentially methylated genes (DMGs) based on group  
250 comparison for DIMP counts by applying generalized linear regression model (GLM). Genes displaying  
251 statistically significant difference in DIMP number relative to control were defined as DMGs. The DMG  
252 is defined distinctly from differentially methylated regions (DMRs), which comprise regions of high  
253 density methylation changes. In the original study of seed methylation data, enormous DMP numbers  
254 were identified in CHH context, corresponding to 23,195 DMRs that largely associated with transposable  
255 elements [21]. However, DMR association with gene regions was only scant. In the drought stress dataset,  
256 only 49 DMRs corresponding to drought stress were identified by the DSS method [24].

257

258 A total of 1068 DMGs were identified for the group comparison of morphogenesis/maturation versus  
259 dormancy phases for seed development (Additional file 1). To investigate the biological meaning of these  
260 DMGs, we conducted a network enrichment analysis test (NEAT). A statistically significant network  
261 enrichment of links between genes from the set of seed development DMGs and the set of *GO-biological*  
262 *process associated with seed functions* was observed (Table 3). The list of 16 networks identified includes



263 positive and negative regulation of GA-mediated signaling, positive and negative regulation of seed  
264 germination, regulation of seed dormancy, and raffinose family oligosaccharide biosynthesis, all well-  
265 established seed processes (full gene list in Additional file 2: Table S2). GeneMANIA [31] identified  
266 interaction networks within the data, indicating that many DMGs in the seed development dataset  
267 function together (Additional file 3: Figure S1). To test the impact of different minimum cytosine  
268 coverage on Methyl-IT output, the pipeline was run without minimum coverage limit (Table 3) and with a  
269 minimum coverage of 10 reads (Additional file 4: Table S3). Results were similar with either setting.  
270  
271 In the drought stress experiment, analyses performed by the original authors detected 2141 CG, 1039  
272 CHG and 718 CHH DMRs, which eventually led to identification of 49 drought stress-related DMRs  
273 [24]. A very weak relationship between methylome changes and phenotype or gene expression patterns  
274 was suggested in the original study [24]. With Methyl-IT, we identified 6669 DMGs (Additional file 5:  
275 Table S4). To investigate whether associations between identified DMGs and gene expression were  
276 evident, we compared the DMG list with the differentially expressed gene (DEG) dataset reported in the  
277 original study with 4371 genes [23]. Fig. 7a shows that the two lists shared 842 genes, accounting for  
278 19.25% DEGs and 12.6% DMGs. Applying NEAT and Network Based Enrichment Analysis (NBEA) to  
279 DEG and DMG datasets, we identified 73 significantly enriched DEG and 23 DMG networks. Among  
280 them, 11 were shared and all were related to plant stress response mechanisms. Fig. 8 shows four  
281 examples within the 11 networks, with MAPK cascade (GO:0000165), response to osmotic stress  
282 (GO:0006970), response to salt stress (GO:0009651), and response to abscisic acid (GO:0009737). Each  
283 gene shown carried significant DIMP signal (Additional file 5: Table S4, Additional file 6: Table S5),  
284 suggesting that a systematic methylation repatterning had occurred within these networks. At an  
285 individual gene level, numerous genes showed both significant gene expression and methylation changes  
286 associated with drought stress response. For example, *ABA INSENSITIVE 1 (ABII, AT4G26080)* encodes  
287 a protein involved in abscisic acid signal transduction that negatively regulates ABA promotion of  
288 stomatal closure [32]. The locus carries 5 DIMPs on average in the three drought stressed plants, and is  
289 up-regulated 3.36 fold. *ABRE BINDING FACTOR 4 (ABF4, AT3G19290)*, encodes a bZIP transcription  
290 factor with specificity for abscisic acid-responsive elements (ABRE), and mediates ABA-dependent stress  
291 responses, acting through the SnRK2 pathway [33]. This gene has an average of 8.7 DIMPs and 2.6-fold  
292 up-regulation. *ABSCISIC ACID RESPONSIVE ELEMENTS-BINDING FACTOR 3 (ABF3, AT4G34000)*  
293 encodes an ABA-responsive element-binding protein with similarity to transcription factors expressed in  
294 response to stress and abscisic acid [34]. In our study, this gene displays 11 DIMPs and is up-regulated 11  
295 fold. *CIRCADIAN CLOCK ASSOCIATED 1 (CCA1, AT2G46830)* encodes a transcriptional repressor that  
296 performs overlapping functions with *LHY* in a regulatory feedback loop that is closely associated with the

297 circadian oscillator of Arabidopsis [35]. This gene shows an average of 7.7 DIMPs and is up-regulated  
298 38.6 fold. Taken together, these data provide enticing indication that differential gene methylation is  
299 subtle, goes undetected by common methodologies, and identifies gene networks that are compelling  
300 candidates for more detailed subsequent investigation.

301

## 302 **Discussion**

303 Methyl-IT draws from the perspective that DNA methylation functions to stabilize DNA [8, 36, 37] and,  
304 as such, may exist in “activated-signal” versus “maintenance” states with regard to bioenergetics. The  
305 theoretical premise underlying our approach, and based on Landauer’s principle, is detailed elsewhere [12,  
306 13], while the present study compares resolution of this methodology to current methods for analysis of  
307 whole-genome methylation datasets. To date, there has not been a statistical biophysics model to  
308 simulate background methylome variation. Consequently, comparisons with other methylation analysis  
309 procedures presented here were limited to published experimental datasets.

310

311 Methyl-IT permits methylation analysis as a signal detection problem. The model predicts that most  
312 methylation changes detected, at least in Arabidopsis, represent methylation “background noise” with  
313 respect to methylation regulatory signal, explainable within a statistical physical probability distribution.  
314 Implicit in our approach is that DIMPs can be detected in the control sample as well. These DIMPs are  
315 located within the region of false alarm in Fig. 1, and correspond to natural methylation signal not  
316 induced by treatment. Thus, using the Methyl-IT procedure, methylation signal is not only distinguished  
317 from background noise, but can be used to discern natural signal from that induced by treatment.

318

319 Whereas methods underlying RMST (methylpy approach) and DSS provide essential information about  
320 methylation density, context and positional changes on a genome-wide scale, Methyl-IT provides  
321 resolution of subtle methylation repatterning signals distinct from background fluctuation. Data derived  
322 from analysis with FET, RMST, HCT or DSS alone could lead to an assumption that gene body  
323 methylation plays little or no role in gene expression, or that transposable elements are the primary target  
324 of methylation repatterning. Yet ample data suggest that this picture is incomplete [38]. Methyl-IT results  
325 show that these conclusions more likely reflect inadequate resolution of the methylome system. GLM  
326 analysis applied to the identification of DMR-associated genes by methylpy [21] and DSS indicates that  
327 DMRs (or DMR associated genes) do not provide sufficient resolution to link them with gene expression.

328

329 Signal detected by Methyl-IT may reflect gene-associated methylation changes that occur in response to  
330 local changes in gene transcriptional activity. Pathway-associated methylome changes detected in seed  
331 development data suggest participation of methylation in gene expression stage transitions, particularly  
332 prominent between mature green and post-mature green stages. Likewise, coincident patterns between  
333 methylome-associated gene networks and gene expression networks during drought stress appear to be  
334 strongly non-random.

335

336 Methyl-IT analysis of various stages in seed development and germination showed evidence of  
337 methylation changes. Previous methylpy output [21] defined predominant changes in non-CG  
338 methylation residing within TE-rich regions of the genome, whereas Methyl-IT data resolved statistically  
339 significant methylation signal within gene regions. With the complementary resolution provided by  
340 Methyl-IT, it becomes possible to investigate the nature of chromatin response within identified genes in  
341 greater detail during the various stages of a seed's development. Several of the identified DMGs in this  
342 study involved genes that interact within known seed-associated pathways.

343

344 A limitation to currently existing methylome data analysis platforms is that most require fairly advanced  
345 coding skills and statistics knowledge, rendering them less directly accessible to most biologists. Methyl-  
346 IT has been designed to be highly user friendly, accessible to any biologist with basic R knowledge.

## 347 **Conclusions**

348 Methyl-IT is an alternative and complementary approach to plant methylome analysis that discriminates  
349 DNA methylation signal from background and enhances resolution. Analysis of publicly available  
350 methylome datasets showed enhanced signal during seed development and germination or during drought  
351 stress within genes belonging to related pathways, providing new evidence that DNA methylation  
352 changes occur within gene networks. Whereas, previous methylome analysis protocols identify changes in  
353 methylome density and landscape, predominantly non-CG, Methyl-IT reveals effects within gene space,  
354 mostly CG and CHG, for elucidation of methylome linkage to gene effects.

## 355 **Methods**

### 356 **Methylome analysis**

357 The alignment of BS-Seq sequence data from *Arabidopsis thaliana* was carried out with Bismark 0.15.0  
358 [39]. BS-Seq sequence data from tomato experiment were aligned using ERNE 2.1.1 [40]. The basic  
359 theoretical aspects of methylation analysis applied in the current work are based on previous published  
360 results [12]. Details on Methyl-IT steps are provided in the next sections.

### 361 **Methylation level estimation**

362 In Methyl-IT pipeline, it is up to the user whether to estimate methylation levels at each cytosine position  
363 following a Bayesian approach or not. In a Bayesian framework assuming uniform priors, the methylation  
364 level  $p_i$  can be defined as:  $p_i = (n_i^{mC} + 1) / (n_i^{mC} + n_i^C + 2)$  (1), where  $n_i^{mC}$  and  $n_i^C$  represent the numbers  
365 of methylated and non-methylated read counts observed at the genomic coordinate  $i$ , respectively. We

366 estimate the shape parameters  $\alpha$  and  $\beta$  from the beta distribution  $P(p|\alpha, \beta) = \frac{p^{\alpha-1}(1-p)^{\beta-1}}{B(\alpha, \beta)}$  (2)

367 minimizing the difference between the empirical and theoretical cumulative distribution functions (ECDF  
368 and CDF, respectively), where  $B(\alpha, \beta)$  is the beta function with shape parameters  $\alpha$  and  $\beta$ . Since the  
369 beta distribution is a prior conjugate of binomial distribution, we consider the  $p$  parameter (methylation  
370 level  $p_i$ ) in the binomial distribution as randomly drawn from a beta distribution. The hyper-parameters

371  $\alpha$  and  $\beta$  are interpreted as pseudo counts. Then, the mean  $E[p_i|D] = \hat{p}_i$  of methylation levels  $p_i$ , given

372 the data  $D$ , is expressed by  $\hat{p}_i = \frac{\alpha + n_i^{mC}}{\alpha + \beta + n_i^{mC} + n_i^C}$  (3). The methylation levels at the cytosine with

373 genomic coordinate  $i$  are estimated according to this equation. If the Bayesian framework is not selected,  
374 then methylation levels are estimated as:  $p_i = n_i^{mC} / (n_i^{mC} + n_i^C)$ .

### 375 **Hellinger and Total Variation divergences of the methylation levels**

376 To evaluate the methylation differences between individuals from control and treatment we introduce a  
377 metric in the bidimensional space of methylation levels:  $P_i = (p_i, 1 - p_i)$ . Vectors  $P_i$  provide a  
378 measurement of the uncertainty of methylation levels at position  $i$ . However, we do not perform a direct  
379 comparison between the uncertainty of methylation levels from each group of individuals, control ( $\hat{p}_i^c$ )  
380 and treatment ( $\hat{p}_i^t$ ), but the uncertainty variation with respect to the same individual reference ( $\hat{p}_i^r$ ) on  
381 the mentioned metric space. The reason to measure the uncertainty variation with respect to the same  
382 reference resides in that even sibling individuals follow an independent ontogenetic development. This a  
383 consequence of the "omnipresent" action of the second law of thermodynamics in living organisms, at  
384 molecular level manifested throughout the actions of Brownian motion and thermal fluctuations on DNA  
385 molecules.

386 The difference between methylation levels from reference and treatment (control) experiments is  
387 expressed in terms of information divergences of their corresponding methylation levels,  $\hat{p}_i^r$  and  $\hat{p}_i^t$  ( $\hat{p}_i^c$ ),

388 respectively. The reference sample(s) can be additional experiment(s) fixed at specific conditions, or a  
 389 virtual sample created by pooling methylation data from a set of control experiments, e.g. wild type  
 390 individual or group.

391 If the read counts  $n_i^{mC}$  and  $n_i^C$  are provided and taken into account, then the Hellinger divergence  
 392 between the methylation levels from reference and treatment experiments is defined as:

$$393 \quad H(\hat{p}_i^r, \hat{p}_i^t) = w_i \left[ \left( \sqrt{\hat{p}_i^r} - \sqrt{\hat{p}_i^t} \right)^2 + \left( \sqrt{1 - \hat{p}_i^r} - \sqrt{1 - \hat{p}_i^t} \right)^2 \right] \quad (4)$$

394 Where  $w_i = 2 \frac{m_i^t m_i^r}{m_i^t + m_i^r}$ ,  $m_i^t = n_i^{mC_t} + n_i^{C_t} + 1$  and  $m_i^r = n_i^{mC_r} + n_i^{C_r} + 1$ . Otherwise, Hellinger  
 395 divergence between the methylation levels from reference and treatment experiments is defined as:

$$396 \quad H(\hat{p}_i^r, \hat{p}_i^t) = 2 \left( \sqrt{\hat{p}_i^t} - \sqrt{\hat{p}_i^r} \right)^2 + \left( \sqrt{1 - \hat{p}_i^t} - \sqrt{1 - \hat{p}_i^r} \right)^2 \quad (5)$$

397 The total variation of the methylation levels  $TV(\hat{p}_i^r, \hat{p}_i^t) = \hat{p}_i^t - \hat{p}_i^r$  (6) indicates the direction of the  
 398 methylation change in the treatment, hypo-methylated  $TV < 0$  or hyper-methylated  $TV > 0$ .  $TV$  is  
 399 linked to a basic information divergence, the total variation distance, defined as:

400  $TVD(\hat{p}_i^r, \hat{p}_i^t) = |TV(\hat{p}_i^r, \hat{p}_i^t)|$  (7) [41]. Distance  $TVD(\hat{p}_i^r, \hat{p}_i^t)$  and Hellinger divergence (as given in

401 Eq. 4) hold the inequality:  $TVD(\hat{p}_i^r, \hat{p}_i^t) \leq \frac{1}{\lambda_i} H(\hat{p}_i^r, \hat{p}_i^t)$  (8), where  $\lambda_i = w_i/2$ , which is a direct

402 consequence of the Cauchy-Schwarz inequality. Under the null hypothesis of non-difference between  
 403 distributions  $\hat{p}_i^r$  and  $\hat{p}_i^t$ , Eq. 4 asymptotically has a chi-square distribution with one degree of freedom,  
 404 which set the basis for a Hellinger chi-square test (HCT). The term  $w_i$  introduces a useful correction for  
 405 the Hellinger divergence, since the estimation of  $\hat{p}_i^t$  and  $\hat{p}_i^r$  are based on counts (see Table 1).

406 In Methyl-IT pipeline, the statistics mean, median, or sum of the read counts at each cytosine site of some  
 407 control samples can be used to create a virtual reference sample. It is up to the user whether to apply the  
 408 'row sum', 'row mean' or 'row median' of methylated and unmethylated read counts at each cytosine site  
 409 across individuals.

410 **Non-linear fit of Weibull distribution**

411 The cumulative distribution functions (CDF) for  $H_k(\hat{p}_k^r, \hat{p}_k^t)$  can be approached by a Weibull

412 distribution  $P(H_k \leq H^0 | \alpha, \lambda, \mu) = 1 - e^{-\left(\frac{H_k - \mu}{\lambda(l)}\right)^\alpha}$  (9) [12]. Parameter  $\hat{\alpha}$ ,  $\hat{\lambda}$  and  $\hat{\mu}$  were estimated by non-

413 linear regression analysis of the ECDF  $\hat{F}_n(\hat{H}_k \leq H^0)$  versus  $H_k(\hat{p}_k^r, \hat{p}_k^t)$  [12]. The ECDF of the

414 variable  $\hat{H}_k$  is defined as:

415 
$$\hat{F}_n(\hat{H}_k \leq H^0) = \frac{\text{number of CDMs in the samples with } \hat{H}_k \leq H^0}{n} = \frac{1}{n} \sum_{k=1}^n 1_{\hat{H}_k \leq H^0} \quad (10)$$

416 , where  $1_{\hat{H}_k \leq H^0} = \begin{cases} 1 & \text{if } \hat{H}_k \leq H^0 \\ 0 & \text{if } \hat{H}_k > H^0 \end{cases}$  is the indicator function. Function  $\hat{F}_n(\hat{H}_k \leq H^0)$  is easily computed

417 (for example, by using function “*ecdf*” of the statistical computing program “R”[42]).

418 **A statistical mechanics-based definition for a potential/putative methylation signal (PMS)**

419 Most methylation changes occurring within cells are likely induced by thermal fluctuations to ensure  
 420 thermal stability of the DNA molecule, conforming to laws of statistical mechanics [12]. These changes  
 421 do not constitute biological signals, but methylation background noise induced by thermal fluctuations,  
 422 and must be discriminated from changes induced by the treatment. Let  $P(E_k^D \leq E_k^{D_0})$  be the probability  
 423 that energy  $E_k^D$ , dissipated to create an observed divergence  $D$  between the methylation levels from two  
 424 different samples at a given genomic position  $k$ , can be lesser than or equal to the amount of energy  $E_k^{D_0}$ .

425 Then, a single genomic position  $k$  shall be called a PMS at a level of significance  $\alpha$  if, and only if, the  
 426 probability  $P(E_k^D > E_k^{D_0}) = 1 - P(E_k^D \leq E_k^{D_0})$  to observe a methylation change with energy dissipation  
 427 higher than  $E_k^{D_0}$  is lesser than  $\alpha$ . The probability  $P(E_k^D \leq E_k^{D_0})$  can be given by a member of the

428 generalized gamma distribution family and, in most cases, experimental data can be fixed by the Weibull  
 429 distribution [12]. Based on this dynamic nature of methylation, one cannot expect a genome-wide  
 430 relationship between methylation and gene expression. A practical definition of PMS based on Hellinger

431 divergence derives provided that  $H_k$  is proportional to  $E_k^H$  and using the estimated Weibull CDF for

432  $H_k$  given by Eq. 8. That is, a single genomic position  $k$  shall be called a PMS at a level of significance

433  $\alpha$  if, and only if, the probability  $\hat{P}(H_k > H^0 | \hat{\alpha}, \hat{\lambda}, \hat{\mu}) = 1 - \hat{P}(H_k \leq H^0 | \hat{\alpha}, \hat{\lambda}, \hat{\mu})$  to observe a  
434 methylation change with Hellinger divergence higher than  $H_k$  is lesser than  $\alpha$ .

435 The PMSs reflect cytosine methylation positions that undergo changes without discerning whether they  
436 represent biological signal created by the methylation regulatory machinery. The application of signal  
437 detection theory is required for robust discrimination of biological signal from physical noise-induced  
438 thermal fluctuations, permitting a high signal-to-noise ratio [18].

### 439 **Robust detection of differentially informative methylated positions (DIMPs)**

440 Application of signal detection theory is required to reach a high signal-to-noise ratio [43, 44]. To  
441 enhance DIMP detection, the set of PMSs is reduced to the subset of cytosines with

442  $TVD(\hat{p}_i^r, \hat{p}_i^t) \leq TVD_0$ , where  $TVD_0$  is a minimal total variation distance defined by the user, preferably

443  $TVD_0 > 0.1$ . If we are interested not only in DIMPs but also in the full spectrum of biological signals,

444 this constraint is not required. Once potential DIMPs are estimated in the treatment and in the control  
445 samples, a logistic regression analysis is performed with the prior binary classification of DIMPs, i.e., in  
446 terms of PMSs (from treatment versus control), and a receiver operating curve (ROC) is built to estimate  
447 the cutpoint of the Hellinger divergence at which an observed methylation level represents a true DIMP.

448 There are several criteria to estimate the optimal cutpoint, many of which are implemented in the R  
449 package *OptimalCutpoints* [27]. The optimal cutpoint used in Methyl-IT corresponds to the  $H$  value that  
450 maximizes Sensitivity and Specificity simultaneously [45, 46]. These analyses were performed with the R  
451 package *Epi* [47].

452 Once all pairwise comparisons are done, a final decision of whether a DFMP is a DIMP is taken based on  
453 the highest cutpoint detected in the ROC analyses (Fig. 1). That is, the decision is taken based on the  
454 cutpoint estimated in the ROC analysis for the control sample with the closest distribution to treatment  
455 samples. The position of the cutpoint will determine a final posterior classification for which we would  
456 estimate the number of true positive, true negatives, false positives and false negatives. For each cutpoint  
457 we would estimate, the accuracy and the risk of our predictions. We may wish to use different cutpoints  
458 for different situations. For example, if our goal is the early detection of a terminal disease and high  
459 values of the target variable indicates that a patient carries the disease, then to save lives we would prefer  
460 the lowest meaningful cutpoint reducing the rate of false negative.

### 461 **DIMP simulation and machine learning classifier**

462 Methyl-IT pipeline was applied to seven random generated individual samples, each on with  $2 \times 10^5$   
463 simulated cytosine positions with their corresponding methylation levels. A reference individual sample



464 was generated with parameters  $\alpha = 1.54$  and  $\beta = 2$  with mean of methylation levels  $E[\hat{p}] = 0.435$  and  
465 variance  $Var[\hat{p}] = 0.0541$ . Two simulation experiments were performed. For the first simulation, total  
466 variations values for three control samples (S11 to S13) were generated using normal distribution with  
467 means (standard deviation): 0.297 (0.31), 0.297 (0.32), and 0.295 (0.34) and for three treatment (S21 to  
468 S23) individual with means (standard deviation): 0.44 (0.3), 0.45 (0.33), and 0.43 (0.34). The overall mean  
469 of all the pairwise differences of methylation levels between control and treatment sample is 0.03.

470

471 TV treatment means were increase in the second simulation with values: 0.54, 0.55, and 0.53. The overall  
472 mean of all the pairwise differences of methylation levels between control and treatment sample is 0.13.  
473 DIMPs were estimated according to Methyl-IT pipeline and a classifier model was inferred with the three  
474 control samples and the first two treatment samples to classify DIMPs into two classes: control (CT) and  
475 treatment (non-CT or 'TT'). Each cytosine site is represented as a four dimensional vector with variables:  
476 HD, TV, Weibull probability, and cytosine relative position estimated as  $(x - x_{min})/(x_{max} - x)$ , where  $x_{min}$   
477 and  $x_{max}$  are the maximum and minimum positions for the corresponding chromosome.

478

479 The set of four dimensional vectors integrated by control and treatment was randomly split into two  
480 subsets: training (60%, used to train the model) and test (40%, used to evaluate the classifier). The  
481 classification performance was evaluated with Monte Carlo resampling and the classifier model was  
482 applied to predict DIMPs from the third treatment sample not included in the construction of the classifier  
483 model. In the case of Monte Carlo resampling, a new random split of the samples is performed for each  
484 resampling.

485

486 Currently, there are seven classifiers available to use with Methyl-IT: logistic regression model (LRM),  
487 linear discriminant analysis (LDA), quadratic discriminant analysis (QDA), support vector machine  
488 (SVM), PCA-LRM using the principal component (PCA) as predictor variables in LMR, PCA-LDA and  
489 PCA-QDA.

#### 490 ***Estimation of differentially methylated genes (DMGs) using Methyl-IT***

491 Our degree of confidence in whether DIMP counts in both control and treatment represent true biological  
492 signal was set out in the signal detection step. To estimate DMGs, we followed similar steps to those  
493 proposed in Bioconductor R package DESeq2 [48], but the test looks for statistical difference between the  
494 groups based on gene body DIMP counts rather than read counts. The regression analysis of the  
495 generalized linear model (GLMs) with logarithmic link was applied to test the difference between group  
496 counts. The fitting algorithmic approaches provided by *glm* and *glm.nb* functions from the R packages

497 *stat* and MASS were used for Poisson (PR), Quasi-Poisson (QPR) and Negative Binomial (NBR) linear  
498 regression analyses, respectively.

499 Likewise for DESeq2 we used the linear regression model  $\log_2(q_{ij}) = \sum_k x_{jk} \beta_{ik}$ , with design matrix  
500 elements  $x_{jk}$ , coefficients  $\beta_{ik}$ , and mean  $\mu_{kj} = s_j q_{kj}$ , where  $s_j$  normalization constants are considered  
501 constant within a group. Only two groups were compared at a time. The design matrix elements indicate  
502 whether a sample  $j$  is treated or not, and the GLM fit returns coefficients indicating the overall  
503 methylation strength at the gene and the logarithm base 2 of the fold change ( $\log_2FC$ ) between treatment  
504 and control [48]. In particular, in the case of NBR, the inverse of the variance was used as prior weight

505 ( $\sigma_{jk}^2 = \frac{1}{\mu_{ij} + \mu_{ij} disp}$ , where *disp* is data dispersion computed by the *estimateDispersions* function from

506 DESeq2 R package).

507 To test difference between group counts we applied the fitting algorithmic approaches: PR and PQR if

508  $\rho < \frac{\mu_{ij}}{\sigma_{ij}} \leq 1$  ( $0.9 < \rho < 1$ ), NBR and NBR with ‘*prior weights*’. Next, best model based on Akaike

509 information criteria (AIC). The Wald test for significance of the independent variable coefficient indicates  
510 whether or not the treatment effect is significant, while the coefficient sign ( $\log_2FC$ ) will indicate the  
511 direction of such an effect.

### 512 **Bootstrap goodness-of-fit test for 2x2 contingency tables**

513 The goodness-of-fit RMST 2x2 contingency tables as implemented in methylpy [20] for the estimation of  
514 DMSs (based on the root-mean-square (RMS) statistics) is explained in Perkins et al. in reference [49](a  
515 complementary description is found at arXiv:1108.4126v2). The bootstrap heuristic to perform the test is  
516 given in reference [50]. An analogous bootstrap goodness-of-fit test based on Hellinger divergence was  
517 also applied to estimate DMCs. In this case, Hellinger divergence estimated according to the first statistic  
518 given in Theorem 1 from reference [51].

### 519 **Network enrichment analysis**

520 Network based enrichment analysis (NBEA) was applied using the EnrichmentBrowser R package [52,  
521 53] and the Network Enrichment Analysis Test (NEAT) was performed by using the R package "neat"  
522 version 1.1.1[53].

### 523 **Abbreviations**

524 **AUC:** Area under the receiver operating characteristic curve

525 **CDM:** Cytosine DNA methylation  
526 **DAGs:** DMR associated genes  
527 **DEG:** Differentially expressed gene  
528 **DIMPs:** Differentially informative methylated positions  
529 **DMGs:** Differentially methylated genes  
530 **DMPs:** Differentially methylated positions  
531 **DMRs:** differentially methylated regions  
532 **DSS:** Dispersion Shrinkage for Sequencing  
533 **FET:** Fisher's exact test  
534 **GLM:** generalized linear regression model  
535 **HD:** Hellinger divergence  
536 **HCT:** Hellinger chi-square test. Goodness-of-fit test based on Hellinger divergence  
537 **NEAT:** Network Enrichment Analysis Test  
538 **NBEA:** Network based enrichment analysis  
539 **RMST:** Root-mean-square test  
540 **ROC:** Receiver operating characteristic curve  
541 **SD:** Signal detection  
542 **TVD:** total variation distance  
543 **PMS:** Potential/putative methylation signal

## 544 **Declarations**

## 545 **Acknowledgments**

546 We thank Diep Ganguly from Australian National University provides guidance on the use of drought  
547 stress data. We thank Professor David Miller from Department of electrical engineering for helpful  
548 discussions.

## 549 **Funding**

550 The work was supported by funding from the Bill and Melinda Gates Foundation (OPP1088661).

## 551 **Availability of data and materials**

552 The source code for all of analysis and visualization, including The Methyl-IT package source code,  
553 Network enrichment analysis, R code for all figures are available at the GitLab:  
554 <https://git.psu.edu/genomath/MethylIT>. Seed development methylome dataset, original studied by

555 Kawakatsu et al. (2017) [21], was obtained from the Gene Expression Omnibus (GEO) under accession  
556 numbers GSE68132. Drought stress methylome dataset was obtained from the Gene Expression Omnibus  
557 (GEO) under accession numbers GSE94075. The differential expressed gene list and express level was  
558 obtained Crisp et al. [23].

559

## 560 **Authors' contributions**

561 RS developed the application of the information thermodynamic theory on cytosine DNA methylation  
562 and conducted mathematical and computational biology analyses, XY participated in methylome data  
563 analysis, JRB conducted computation, HK conducted the NBEA, NEAT analysis. SM designed  
564 experiments, participated in data analysis and wrote manuscript.

565

## 566 **Competing interests**

567 Not applicable

568

## 569 **Consent for publication**

570 Not applicable

571

## 572 **Ethics approval and consent to participate**

573 Not applicable

574

575

576 **Figures**

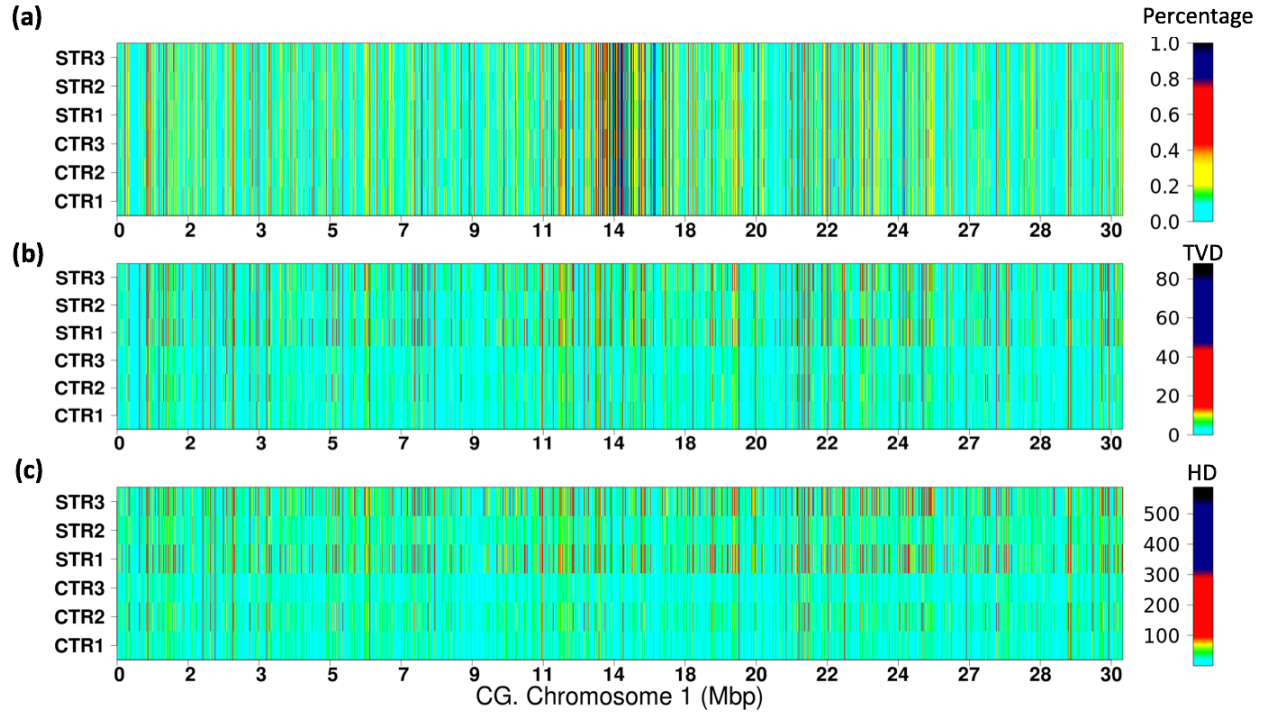

577  
 578  
 579  
 580  
 581  
 582  
 583  
 584  
 585  
 586  
 587

**Fig. 1** Comparison of three variables used to measure DNA cytosine methylation.

The heatmap for CG methylation distribution represented by (a) methylation level (percentage), (b) total variation distance (TVD), and (c) Hellinger divergence (HD) on chromosome 1 for the drought stress experimental data are shown. Chromosomes were split into 2-kb non-overlapping windows (regions). The mean of methylation levels for each region  $i$  was estimated as:  $p_i = \sum_{j=1}^{2kb} mC_{ij} / \sum_{j=1}^{2kb} (mC_{ij} + uC_{ij})$ , while  $TVD_i = \sum_{j=1}^{2kb} TVD_{ij}$  and  $HD_i = \sum_{j=1}^{2kb} HD_{ij}$ .

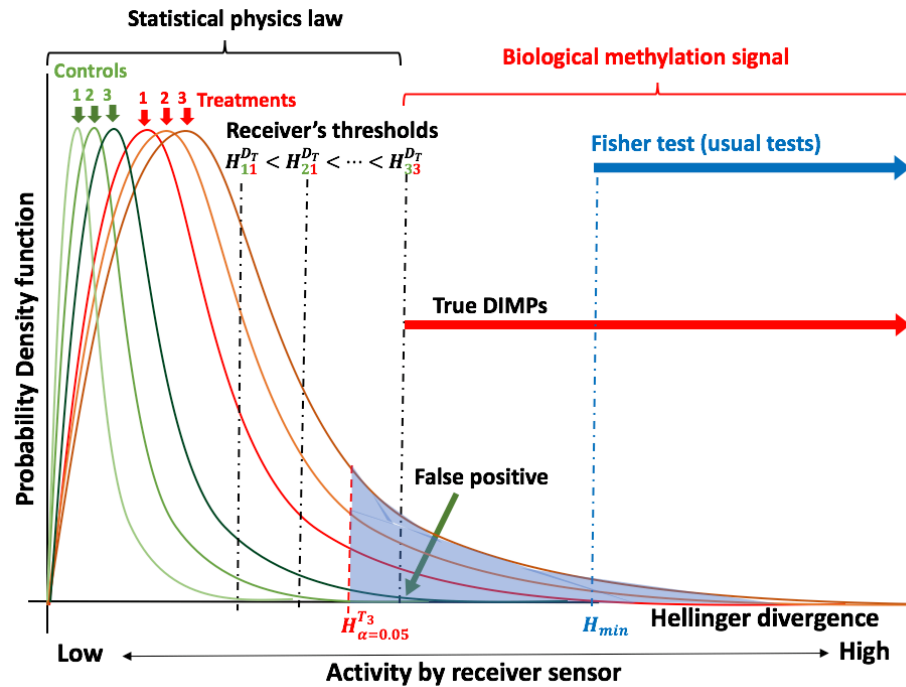

588  
589  
590  
591  
592  
593  
594  
595  
596  
597  
598  
599

**Fig. 2** Schematic of the theoretical principle underlying Methyl-IT. Methyl-IT is designed to identify a statistically significant cutoff between thermal system noise (conforming to laws of statistical physics) and treatment signal (biological methylation signal), based on Hellinger divergence (H), to identify “true” differentially informative methylation positions (DIMPs). Empirical comparisons allow the placement of Fisher’s exact test for discrimination of DMPs.

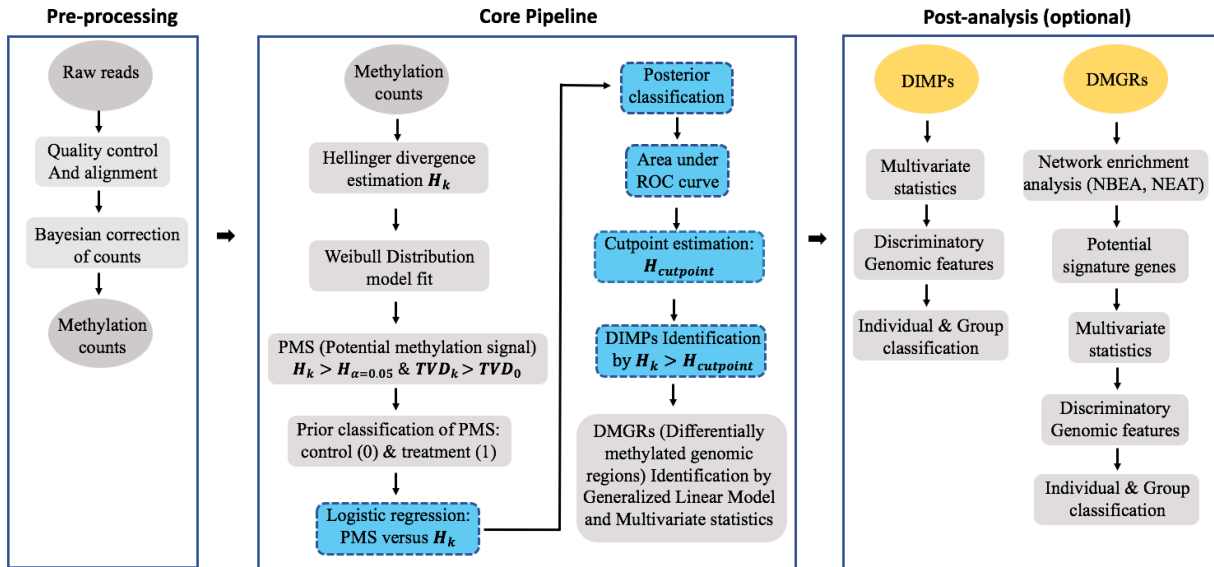

600

601

602 **Fig. 3** Methyl-IT processing flowchart. Ovals represent input and output data, squares represent  
 603 processing steps, with signal detection processing steps highlighted in blue and DIMPs and DMGRs, as  
 604 main outputs of Methyl-IT, highlighted in yellow. The generalized linear model is incorporated for group  
 605 comparison of genomic regions (GRs) based on the number of DIMPs in the treatment group relative to  
 606 control group. DIMPs and DMGRs can be subjected to further statistical analyses to perform network  
 607 enrichment analysis and to identify potential signature genes, multivariate statistical analysis (and  
 608 machine learning applications) for individual and group classifications.

609

610

611

612



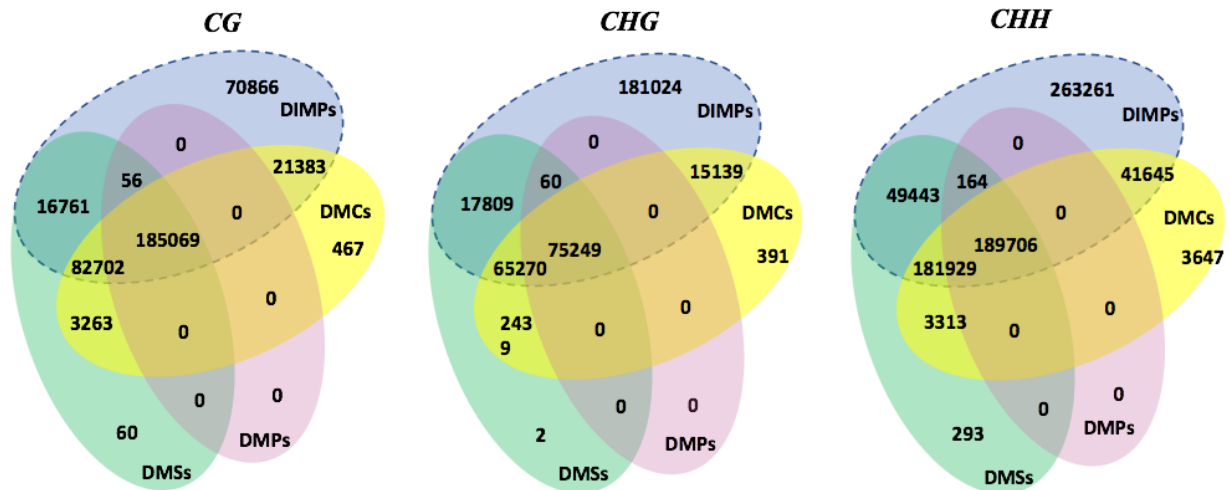

613

614 **Fig. 4** Venn diagrams of overlapping DMSs (RMST implemented in methylpy software), DMPs  
615 (obtained with Fisher Exact Test), DMCs (obtained with HCT, see methods) and DIMPs (obtained with  
616 Methyl-IT) for the drought experimental data. Only methylated cytosine positions with total variation  
617 distance (TVD) greater than 0.25 (25% of methylation level difference) are shown for the three  
618 methylation contexts. DIMPs carrying methylation signal are in the region within the dashed oval.

619

620

621

622

623

624

625

626

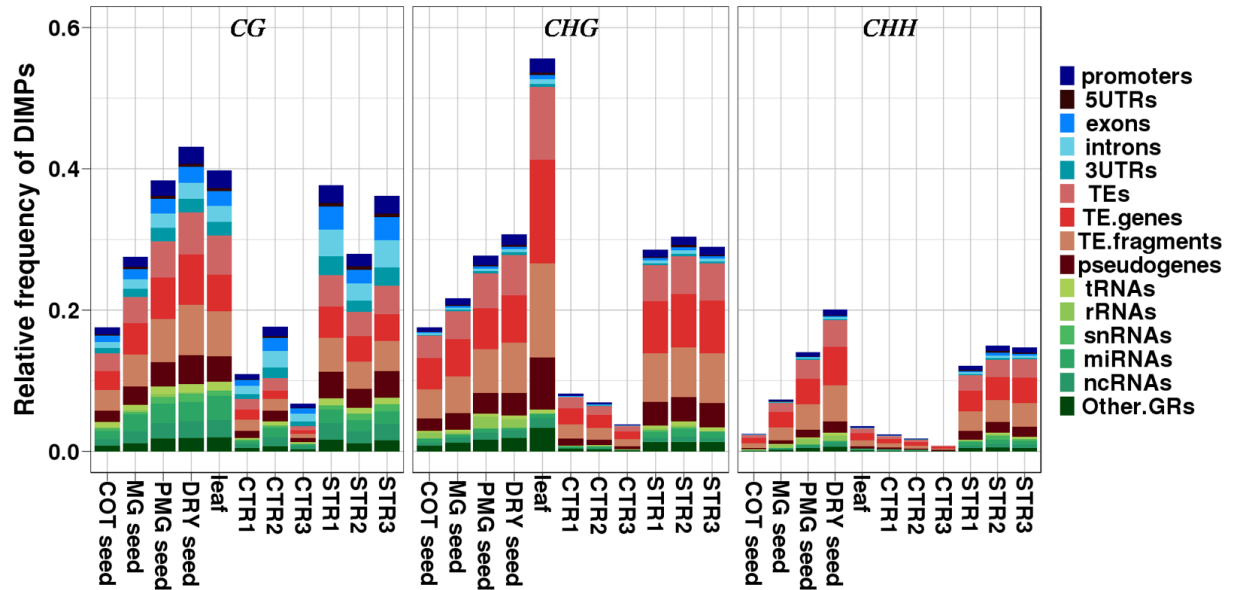

627

628

629

630 **Fig. 5** Results of signal detection with Methyl-IT for genome-wide methylome data from seed

631 development samples from Kawakatsu et al [21] at five seed stages (GLOB, COT, MG, PMG, DRY) and

632 leaf (globular (GLOB) stage used as control), and drought stress experiment control (CTR) and stress

633 (STR) samples from Ganguly et al. [24]. The experimental results provide a direct, scaled comparison of

634 methylation signal between datasets. The relative frequency of DIMPs was estimated as the number of

635 DIMPs divided by the number of cytosine positions.

636

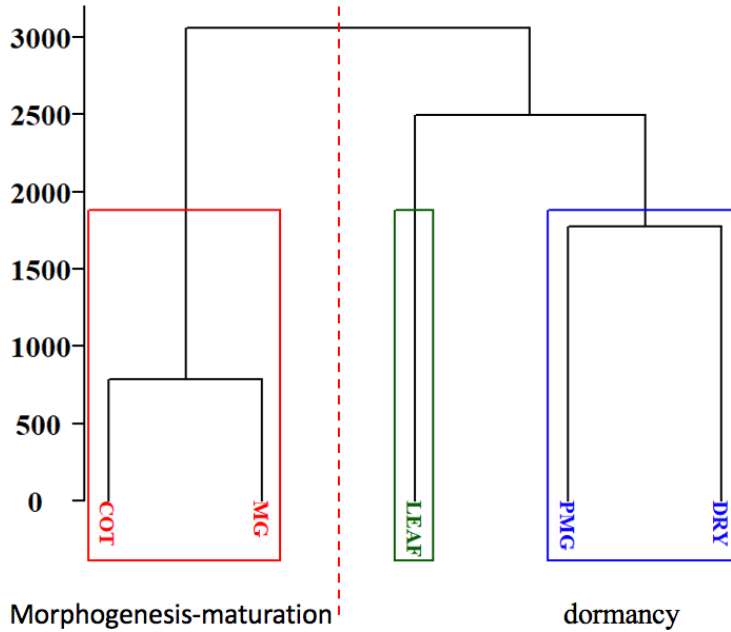

637

638

639 **Fig. 6** Classification of seed development stages based on identified DIMPs. A hierarchical cluster built  
640 on the set of 7006 selected DIMP-associated genes, based on AUC criteria, classified the stages into two  
641 groups: morphogenesis-maturation phase and dormancy phase.

642

643

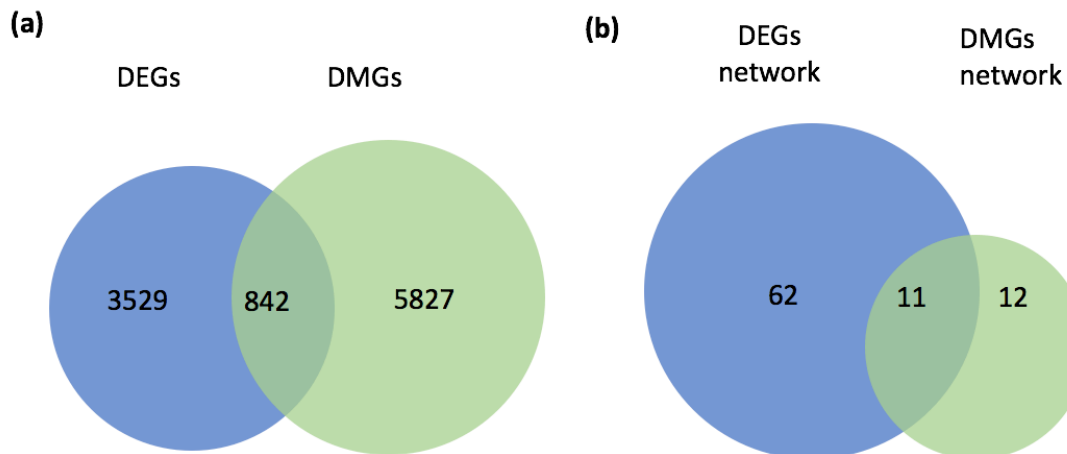

644

645 **Fig. 7** Differential expressed genes(DEGs) vs differential methylated genes(DMGs) in unstressed plants  
646 vs drought stressed plants comparison. **(a)** 4371 DEGs were identified by [24] and 6669 DMGs were  
647 identified by Methyl-IT. **(b)** 73 and 23 significantly enriched networks were identified from 4371 DEGs  
648 and 6669 DMGs, respectively. NEAT and NBEA analysis were used to identify enriched network (see  
649 Method).

650

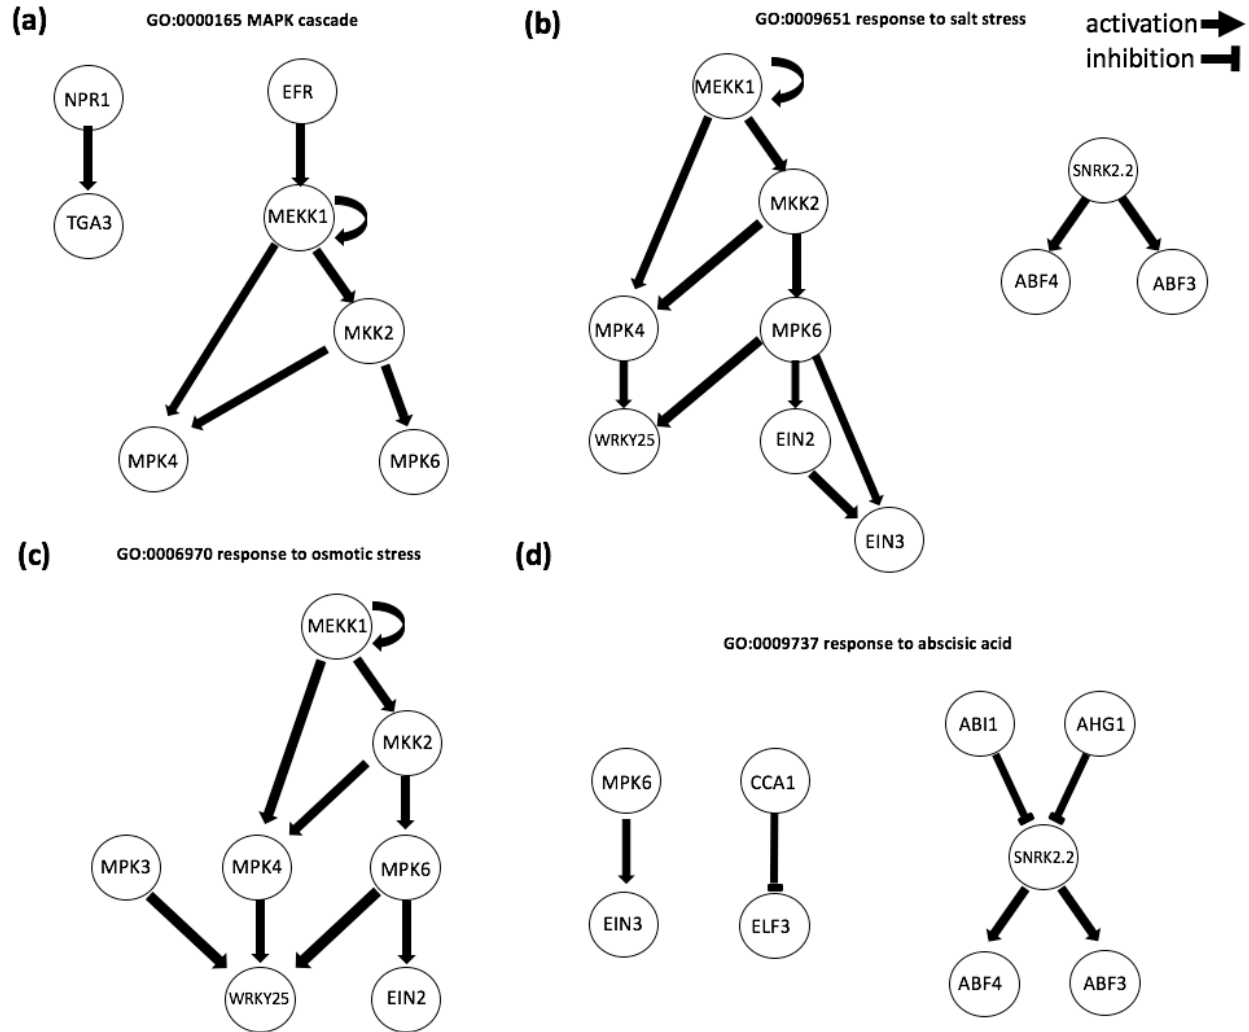

651

652

653 **Fig. 8** Examples of enriched networks identified by NBEA using DMGs. Genes involved in (a) MAPK

654 cascade, (b) response to salt stress, (c) response to osmotic stress, and (d) response to abscisic acid are

655 in circles. Network graphs were generated by EnrichmentBrowser R package in R. Details of DIMPs

656 number for each gene could be found in additional file 6.

657

658 **Tables**

659 **Table 1.** Relative sensitivity differences between several statistical tests applied to identify differentially  
660 methylated cytosines. P-values for the 2x2 contingency table with read counts  $n_i^{mC_c} = 8$ ,  $n_i^{C_c} = 2$ ,  
661  $n_i^{mC_t} = 350$ , and  $n_i^{C_t} = 20$ .

| Approach                         | p-value  | Significance( $\alpha = 0.05$ ) |
|----------------------------------|----------|---------------------------------|
| FET                              | 0.108615 | No                              |
| FET one tail                     | 0.108615 | No                              |
| FET p.value MC 3k <sup>(1)</sup> | 0.1086   | No                              |
| RMST Boot 3k <sup>(2)</sup>      | 0.051    | No                              |
| HT Boot 3k <sup>(3)</sup>        | 0.050667 | No                              |
| Weibull STR1 CG <sup>(4)</sup>   | 5.08E-04 | Yes                             |
| Weibull STR2 CG <sup>(4)</sup>   | 3.20E-04 | Yes                             |
| Weibull STR3 CG <sup>(4)</sup>   | 3.20E-04 | Yes                             |

662 <sup>1</sup>p.value simulated with Monte Carlo (MC) simulation with 3000 resamplings (3k). <sup>2</sup>Bootstrap goodness-of-fit  
663 RMST as implemented in methylpy [20]. <sup>3</sup>Bootstrap goodness-of-fit test based on Hellinger divergence estimated  
664 according to the first statistic given Theorem 1 from reference [51]. <sup>3</sup>p-value based on the Weibull distribution for  
665 memory lines (STR 1 to 3).  $n_i^{mC_c}$  refers to methylated cytosine counts in control,  $n_i^{C_c}$  refers to non-methylated  
666 cytosine counts in control,  $n_i^{mC_t}$  refers to methylated cytosine counts in treatment and  $n_i^{C_t}$  refers to non-methylated  
667 cytosine counts in treatment. The R script to compute RMST and HMC estimation is provided in GitLab:  
668 <https://git.psu.edu/genomath/MethylIT>

669

670

671

672 **Table 2.** Classification of DIMPs into two classes: control (CT) and non-control (non-CT)

| <b>Parameters from the best fitted Weibull model estimated for simulate data</b> |                    |          |          |          |          |          |                 |
|----------------------------------------------------------------------------------|--------------------|----------|----------|----------|----------|----------|-----------------|
| <b>Parameters</b>                                                                | <sup>(1)</sup> S11 | S12      | S13      | S21      | S22      | S23      | <b>TVD mean</b> |
| <b>alpha.1<sup>(2)</sup></b>                                                     | 0.645650           | 0.645195 | 0.645586 | 0.649747 | 0.651112 | 0.650272 | 0.03            |
| <b>scale.1</b>                                                                   | 0.249118           | 0.253707 | 0.253919 | 0.257382 | 0.268151 | 0.258988 |                 |
| <b>alpha.2<sup>(3)</sup></b>                                                     | 0.645650           | 0.645195 | 0.645586 | 0.656598 | 0.654718 | 0.652522 | 0.13            |
| <b>scale.2</b>                                                                   | 0.249118           | 0.253707 | 0.253919 | 0.290850 | 0.300384 | 0.290910 |                 |

  

| <b>Performance of classifier models built on simulated data</b> |                 |                                    |                    |                    |                  |                  |                        |
|-----------------------------------------------------------------|-----------------|------------------------------------|--------------------|--------------------|------------------|------------------|------------------------|
| <b>Classifier model</b>                                         | <b>Accuracy</b> | <sup>(4)</sup> <b>MC. Accuracy</b> | <b>Sensitivity</b> | <b>Specificity</b> | <b>Pos. Pred</b> | <b>Neg. Pred</b> | <b>CT/non-CT (S23)</b> |
| <b>PCA-QDA.1</b>                                                | 0.8088          | 0.8101                             | 0.537              | 0.9763             | 0.9483           | 0.7592           | 1213/ <b>378</b>       |
| <b>PCA-QDA.2</b>                                                | 0.9997          | 0.9998                             | 1                  | 0.9994             | 0.9995           | 1                | 0/ <b>2508</b>         |

  

| <b>Performance of classifier models built on CT: COT and MG, and non-CT: PMG and DRY</b> |                       |                 |                    |                    |                 |                  |                                       |
|------------------------------------------------------------------------------------------|-----------------------|-----------------|--------------------|--------------------|-----------------|------------------|---------------------------------------|
| <b>Methylation Context</b>                                                               | <b>Classif. Model</b> | <b>Accuracy</b> | <b>Sensitivity</b> | <b>Specificity</b> | <b>Pos Pred</b> | <b>Neg. Pred</b> | <b>Predictions for LEAF CT/non-CT</b> |
| <b>CG</b>                                                                                | Logistic              | 0.9011          | 0.9984             | 0.7222             | 0.8685          | 0.996            | 18/ <b>166186</b>                     |
| <b>CHG</b>                                                                               | Logistic              | 0.7541          | 0.8842             | 0.5574             | 0.7512          | 0.7611           | 3174/ <b>205463</b>                   |
| <b>CHH</b>                                                                               | PCA-QDA               | 0.9074          | 0.9716             | 0.671              | 0.9158          | 0.865            | 69102/ <b>3906</b>                    |

673

674 <sup>(1)</sup>Simulated samples were denoted S11, S12... S23 (S11 to S13 are control, the remainder treatment). <sup>(2)</sup>1<sup>st</sup>

675 simulation experiment. <sup>(3)</sup>2<sup>nd</sup> simulation experiment. <sup>(4)</sup> Accuracy mean for 500 Monte Carlos resamplings.

676

677

678 **Table 3.** Network enrichment analysis test (NEAT) on the set of GO-biological process (BP-GO) for the  
 679 differentially methylated genes in Ws-0 seed development dataset.  
 680

| BP-GO                                                                         | NAB | Expected NAB | Adj. <i>p</i> -value |
|-------------------------------------------------------------------------------|-----|--------------|----------------------|
| GO:0000902 cell morphogenesis                                                 | 3   | 0.2492       | 0.00280              |
| GO:0006623 protein targeting to vacuole                                       | 4   | 0.299        | < 0.001              |
| GO:0006891 intra-Golgi vesicle-mediated transport                             | 4   | 0.3323       | < 0.001              |
| GO:0009723 response to ethylene                                               | 8   | 2.9072       | 0.00873              |
| GO:0009740 gibberellic acid mediated signaling pathway                        | 5   | 0.9802       | 0.00375              |
| GO:0009845 seed germination                                                   | 6   | 1.3456       | 0.00301              |
| GO:0009938 negative regulation of gibberellic acid mediated signaling pathway | 4   | 0.2658       | < 0.001              |
| GO:0010162 seed dormancy process                                              | 5   | 1.03         | 0.00434              |
| GO:0010187 negative regulation of seed germination                            | 3   | 0.4319       | 0.00916              |
| GO:0010325 raffinose family oligosaccharide biosynthetic process              | 5   | 0.3323       | 0.00102              |
| GO:0016049 cell growth                                                        | 3   | 0.3655       | 0.00640              |
| GO:0016192 vesicle-mediated transport                                         | 5   | 0.3987       | < 0.001              |
| GO:0016197 endosomal transport                                                | 2   | 0.0665       | 0.00280              |
| GO:0048444 floral organ morphogenesis                                         | 5   | 0.3323       | < 0.001              |
| GO:2000033 regulation of seed dormancy process                                | 3   | 0.1994       | 0.0017               |
| GO:2000377 regulation of reactive oxygen species metabolic process            | 4   | 0.4153       | 0.00154              |

681

682 Only over-enriched pathways are included

683 NAB: observed number of (network) links from DMG list to GO term gene list

684 Expected NAB: expected number of links from DMG list to GO term gene list (in absence of enrichment)

685 Enrichment Fold: the ratio of NAB (observed number of network links) / expected nab (expected number of links)

686

Table 4. Overlapped pathways between DEGs and DMGs in drought stress data

| No. | Gene Ontology term                                                                 |
|-----|------------------------------------------------------------------------------------|
| 1   | GO:0000165 MAPK cascade                                                            |
| 2   | GO:0006970 response to osmotic stress                                              |
| 3   | GO:0009409 response to cold                                                        |
| 4   | GO:0009651 response to salt stress                                                 |
| 5   | GO:0009723 response to ethylene                                                    |
| 6   | GO:0009737 response to abscisic acid                                               |
| 7   | GO:0009862 systemic acquired resistance, salicylic acid mediated signaling pathway |
| 8   | GO:0009863 salicylic acid mediated signaling pathway                               |
| 9   | GO:0009867 jasmonic acid mediated signaling pathway                                |
| 10  | GO:0031348 negative regulation of defense response                                 |



11 GO:0042742 defense response to bacterium

---

687  
688  
689

690 **Additional files**

691 Additional file 1: Table.S1 DMGs from Arabidopsis seed development dataset.

692

693 Additional file 2: Table.S2 List of seed development DMGs found\_in networks based on NEAT.

694

695 Additional file 3: Figure.S1 Interaction network built for the seed development DMGs in networks

696 identified with NEAT using GeneMNI.

697

698 Additional file 4: Table.S3 Enriched network from seed development DMGs (with minimum coverage 10  
699 reads).

700

701 Additional file 5: Table.S4 List of 6669 DMGs identified in the drought stress experiment.

702

703 Additional File 6: Table. S5 DMGs in the enriched networks identified by NBEA for the drought stress  
704 data.

705

706 **References**

- 707 1. Calarco JP, Borges F, Donoghue MTA, Van Ex F, Jullien PE, Lopes T, Gardner R,  
708 Berger F, Feijo JA, Becker JD et al: Reprogramming of DNA Methylation in Pollen  
709 Guides Epigenetic Inheritance via Small RNA. *Cell* 2012, 151(1):194-205.
- 710 2. Schmitz RJ, Schultz MD, Lewsey MG, O'Malley RC, Urich MA, Libiger O, Schork NJ,  
711 Ecker JR: Transgenerational Epigenetic Instability Is a Source of Novel Methylation  
712 Variants. *Science* 2011, 334(6054):369-373.
- 713 3. Becker C, Hagemann J, Muller J, Koenig D, Stegle O, Borgwardt K, Weigel D:  
714 Spontaneous epigenetic variation in the Arabidopsis thaliana methylome. *Nature*  
715 2011, 480(7376):245-U127.
- 716 4. Matzke MA, Mosher RA: RNA-directed DNA methylation: an epigenetic pathway of  
717 increasing complexity (vol 15, 394, 2014). *Nat Rev Genet* 2014, 15(8).
- 718 5. Crisp PA, Ganguly D, Eichten SR, Borevitz JO, Pogson BJ: Reconsidering plant  
719 memory: Intersections between stress recovery, RNA turnover, and epigenetics. *Sci*  
720 *Adv* 2016, 2(2).
- 721 6. Kinoshita T, Seki M: Epigenetic Memory for Stress Response and Adaptation in  
722 Plants. *Plant Cell Physiol* 2014, 55(11):1859-1863.

- 723 7. Colaneri AC, Jones AM: Genome-Wide Quantitative Identification of DNA  
724 Differentially Methylated Sites in Arabidopsis Seedlings Growing at Different Water  
725 Potential. *Plos One* 2013, 8(4).
- 726 8. Severin PM, Zou X, Gaub HE, Schulten K: Cytosine methylation alters DNA  
727 mechanical properties. *Nucleic Acids Res* 2011, 39(20):8740-8751.
- 728 9. Osakabe A, Adachi F, Arimura Y, Maehara K, Ohkawa Y, Kurumizaka H: Influence of  
729 DNA methylation on positioning and DNA flexibility of nucleosomes with pericentric  
730 satellite DNA. *Open Biol* 2015, 5(10).
- 731 10. Yusufaly TI, Li Y, Olson WK: 5-Methylation of cytosine in CG:CG base-pair steps: a  
732 physicochemical mechanism for the epigenetic control of DNA nanomechanics. *J*  
733 *Phys Chem B* 2013, 117(51):16436-16442.
- 734 11. Jenkinson G, Pujadas E, Goutsias J, Feinberg AP: Potential energy landscapes identify  
735 the information-theoretic nature of the epigenome. *Nat Genet* 2017, 49(5):719-+.
- 736 12. Sanchez R, Mackenzie SA: Information Thermodynamics of Cytosine DNA  
737 Methylation. *Plos One* 2016, 11(3).
- 738 13. Sanchez R, Mackenzie SA: Genome-Wide Discriminatory Information Patterns of  
739 Cytosine DNA Methylation. *Int J Mol Sci* 2016, 17(6).
- 740 14. Greiner M, Pfeiffer D, Smith RD: Principles and practical application of the receiver-  
741 operating characteristic analysis for diagnostic tests. *Prev Vet Med* 2000, 45(1-  
742 2):23-41.
- 743 15. Carter JV, Pan J, Rai SN, Galandiuk S: ROC-ing along: Evaluation and interpretation of  
744 receiver operating characteristic curves. *Surgery* 2016, 159(6):1638-1645.
- 745 16. Harpaz R, DuMouchel W, LePendu P, Bauer-Mehren A, Ryan P, Shah NH:  
746 Performance of pharmacovigilance signal-detection algorithms for the FDA adverse  
747 event reporting system. *Clin Pharmacol Ther* 2013, 93(6):539-546.
- 748 17. Kruspe S, Dickey DD, Urak KT, Blanco GN, Miller MJ, Clark KC, Burghardt E, Gutierrez  
749 WR, Phadke SD, Kamboj S et al: Rapid and Sensitive Detection of Breast Cancer Cells  
750 in Patient Blood with Nuclease-Activated Probe Technology. *Mol Ther Nucleic Acids*  
751 2017, 8:542-557.
- 752 18. Kay SM: Fundamentals of Statistical Signal Processing, Volume II: Detection Theory,  
753 1 edition edn; 1998.
- 754 19. Wu H, Xu T, Feng H, Chen L, Li B, Yao B, Qin Z, Jin P, Conneely KN: Detection of  
755 differentially methylated regions from whole-genome bisulfite sequencing data  
756 without replicates. *Nucleic Acids Res* 2015, 43(21):e141.
- 757 20. Schultz MD, He Y, Whitaker JW, Hariharan M, Mukamel EA, Leung D, Rajagopal N,  
758 Nery JR, Urich MA, Chen H et al: Human body epigenome maps reveal noncanonical  
759 DNA methylation variation. *Nature* 2015, 523(7559):212-216.
- 760 21. Kawakatsu T, Nery JR, Castanon R, Ecker JR: Dynamic DNA methylation  
761 reconfiguration during seed development and germination. *Genome Biol* 2017,  
762 18(1):171.
- 763 22. Schmitz RJ, Schultz MD, Urich MA, Nery JR, Pelizzola M, Libiger O, Alix A, McCosh RB,  
764 Chen H, Schork NJ et al: Patterns of population epigenomic diversity. *Nature* 2013,  
765 495(7440):193-198.
- 766 23. Crisp PA, Ganguly DR, Smith AB, Murray KD, Estavillo GM, Searle I, Ford E,  
767 Bogdanovic O, Lister R, Borevitz JO et al: Rapid Recovery Gene Downregulation

- 768 during Excess-Light Stress and Recovery in Arabidopsis. *Plant Cell* 2017,  
769 29(8):1836-1863.
- 770 24. Ganguly DR, Crisp PA, Eichten SR, Pogson BJ: The Arabidopsis DNA Methylome Is  
771 Stable under Transgenerational Drought Stress. *Plant Physiol* 2017, 175(4):1893-  
772 1912.
- 773 25. Basu A, Mandal A, Pardo L: Hypothesis testing for two discrete populations based on  
774 the Hellinger distance. *Stat Probabil Lett* 2010, 80(3-4):206-214.
- 775 26. Vaart A: *Asymptotic Statistics*: Cambridge University Press. ; 1998.
- 776 27. Mónica López-Ratón MXR-Á, Carmen Cadarso-Suárez, Francisco Gude-Sampedro:  
777 *OptimalCutpoints: An R Package for Selecting Optimal Cutpoints in Diagnostic Tests*.  
778 *Journal of statistical software* 2014, Vol 61 (2014)(Issue 8):4896.
- 779 28. Perkins W, Tygert M, Ward R: Computing the confidence levels for a root-mean-  
780 square test of goodness-of-fit. *Applied Mathematics and Computation* 2011,  
781 217(22):9072-9084.
- 782 29. Le BH, Cheng C, Bui AQ, Wagmaister JA, Henry KF, Pelletier J, Kwong L, Belmonte M,  
783 Kirkbride R, Horvath S et al: Global analysis of gene activity during Arabidopsis seed  
784 development and identification of seed-specific transcription factors. *Proc Natl Acad Sci U S A* 2010, 107(18):8063-8070.
- 785 30. Bassel GW, Lan H, Glaab E, Gibbs DJ, Gerjets T, Krasnogor N, Bonner AJ, Holdsworth  
786 MJ, Provart NJ: Genome-wide network model capturing seed germination reveals  
787 coordinated regulation of plant cellular phase transitions. *Proc Natl Acad Sci U S A*  
788 2011, 108(23):9709-9714.
- 790 31. Mostafavi S, Ray D, Warde-Farley D, Grouios C, Morris Q: GeneMANIA: a real-time  
791 multiple association network integration algorithm for predicting gene function.  
792 *Genome Biol* 2008, 9 Suppl 1:S4.
- 793 32. Krzywinska E, Bucholc M, Kulik A, Ciesielski A, Lichocka M, Debski J, Ludwikow A,  
794 Dadlez M, Rodriguez PL, Dobrowolska G: Phosphatase ABI1 and okadaic acid-  
795 sensitive phosphoprotein phosphatases inhibit salt stress-activated SnRK2.4 kinase.  
796 *Bmc Plant Biol* 2016, 16(1):136.
- 797 33. Yoshida T, Fujita Y, Maruyama K, Mogami J, Todaka D, Shinozaki K, Yamaguchi-  
798 Shinozaki K: Four Arabidopsis AREB/ABF transcription factors function  
799 predominantly in gene expression downstream of SnRK2 kinases in abscisic acid  
800 signalling in response to osmotic stress. *Plant Cell Environ* 2015, 38(1):35-49.
- 801 34. Yoshida T, Fujita Y, Sayama H, Kidokoro S, Maruyama K, Mizoi J, Shinozaki K,  
802 Yamaguchi-Shinozaki K: AREB1, AREB2, and ABF3 are master transcription factors  
803 that cooperatively regulate ABRE-dependent ABA signaling involved in drought  
804 stress tolerance and require ABA for full activation. *Plant J* 2010, 61(4):672-685.
- 805 35. Yakir E, Hilman D, Hassidim M, Green RM: CIRCADIAN CLOCK ASSOCIATED1  
806 transcript stability and the entrainment of the circadian clock in Arabidopsis. *Plant*  
807 *Physiol* 2007, 145(3):925-932.
- 808 36. Lefebvre A, Mauffret O, el Antri S, Monnot M, Lescot E, Fermannjian S: Sequence  
809 dependent effects of CpG cytosine methylation. A joint 1H-NMR and 31P-NMR study.  
810 *Eur J Biochem* 1995, 229(2):445-454.
- 811 37. Nathan D, Crothers DM: Bending and flexibility of methylated and unmethylated  
812 EcoRI DNA. *J Mol Biol* 2002, 316(1):7-17.

- 813 38. Huang SC, Ecker JR: Piecing together cis-regulatory networks: insights from  
814 epigenomics studies in plants. Wiley Interdiscip Rev Syst Biol Med 2017.
- 815 39. Krueger F, Andrews SR: Bismark: a flexible aligner and methylation caller for  
816 Bisulfite-Seq applications. *Bioinformatics* 2011, 27(11):1571-1572.
- 817 40. Prezza N, Vezzi F, Kaller M, Policriti A: Fast, accurate, and lightweight analysis of BS-  
818 treated reads with ERNE 2. *Bmc Bioinformatics* 2016, 17.
- 819 41. Sason I, Verdu S: f-Divergence Inequalities. *Ieee Transactions on Information Theory*  
820 2016, 62(11):5973-6006.
- 821 42. R\_Core\_Team: A language and environment for statistical computing. 2016.
- 822 43. Hippenstiel RD: *Detection Theory: Applications and Digital Signal Processing*. CRC  
823 Press 2001.
- 824 44. Stanislaw H, Todorov N: Calculation of signal detection theory measures. *Behav Res*  
825 *Meth Ins C* 1999, 31(1):137-149.
- 826 45. Youden WJ: Index for rating diagnostic tests. *Cancer* 1950, 3(1):32-35.
- 827 46. Perkins NJ, Schisterman EF: The inconsistency of "optimal" cutpoints obtained using  
828 two criteria based on the receiver operating characteristic curve. *Am J Epidemiol*  
829 2006, 163(7):670-675.
- 830 47. Carstensen B, Plummer, M., Laara, E. & Hills, M.: *Epi:A Package for Statistical*  
831 *Analysis in Epidemiology*. R package version 27 2016.
- 832 48. Love MI, Huber W, Anders S: Moderated estimation of fold change and dispersion  
833 for RNA-seq data with DESeq2. *Genome Biol* 2014, 15(12).
- 834 49. William Perkins MT, Rachel Ward: Computing the confidence levels for a root-mean-  
835 square test of goodness-of-fit. *Applied Mathematics and Computation* 2011, Volume  
836 217(issue 22):Pages 9072-9084.
- 837 50. He Y, Gorkin DU, Dickel DE, Nery JR, Castanon RG, Lee AY, Shen Y, Visel A,  
838 Pennacchio LA, Ren B et al: Improved regulatory element prediction based on  
839 tissue-specific local epigenomic signatures. *Proc Natl Acad Sci U S A* 2017,  
840 114(9):E1633-E1640.
- 841 51. F. Liese IV: On Divergences and Informations in Statistics and Information Theory.  
842 *IEEE Transactions on Information Theory* 2006, Volume: 52(Issue: 10):4394 - 4412.
- 843 52. Geistlinger L, Csaba G, Zimmer R: Bioconductor's EnrichmentBrowser: seamless  
844 navigation through combined results of set- & network-based enrichment analysis.  
845 *Bmc Bioinformatics* 2016, 17.
- 846 53. Signorelli M, Vinciotti V, Wit EC: NEAT: an efficient network enrichment analysis  
847 test. *Bmc Bioinformatics* 2016, 17.
- 848
